# Supplementary material for: Base-driven keto–enol anion tautomerism of a perylene diimide derivative in DMF solution
Source: Royal Society of Chemistry journal article supplement (doi:10.1039/c6ra12462c), 2016-01-01
Supplement: c6ra12462c1.pdf [file c6ra12462c1.pdf]

## Base-Driven Keto-Enol Anion Tautomerism of Perylene

### Diimide Derivative in DMF Solution

Jianmin Wang, Enfang He, Hailong Wang, Wenlong Hou, Jing Xu, Xiao Wang, Huiyun Guo,  
Zhenlin Zhang, Ruijun Zhang,\* Haiquan Zhang\*

State Key Laboratory of Metastable Materials Science and Technology, Yanshan University, Qinhuangdao 066004, PR

China

\*Corresponding author. E-mail: zhangrj@ysu.edu.cn; hqzhang@ysu.edu.cn

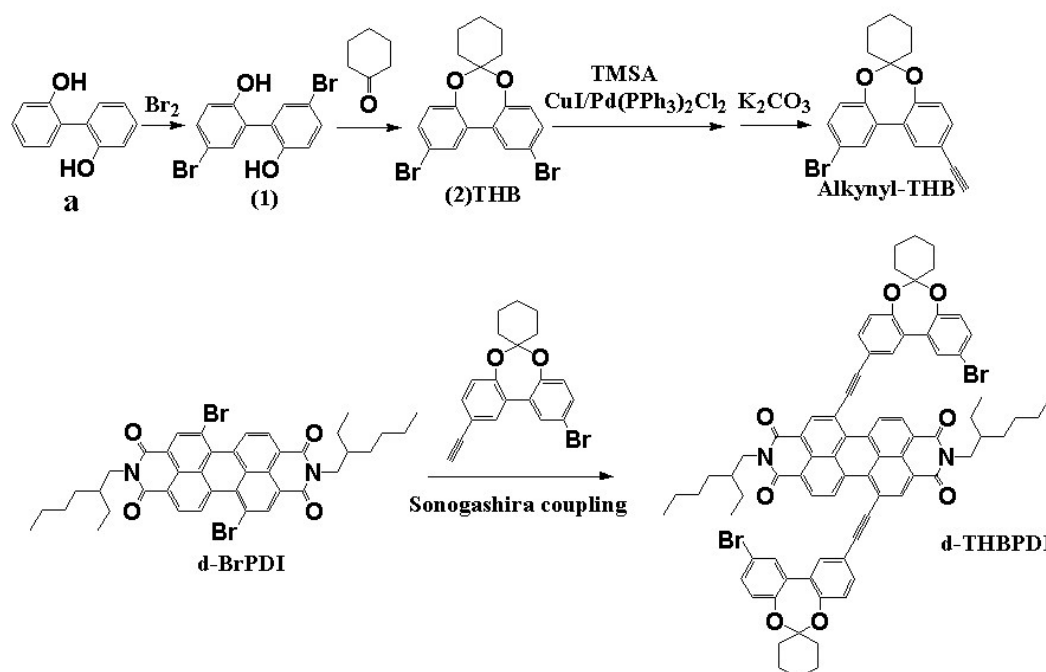

Scheme 1 synthesis route of d-THBPDI

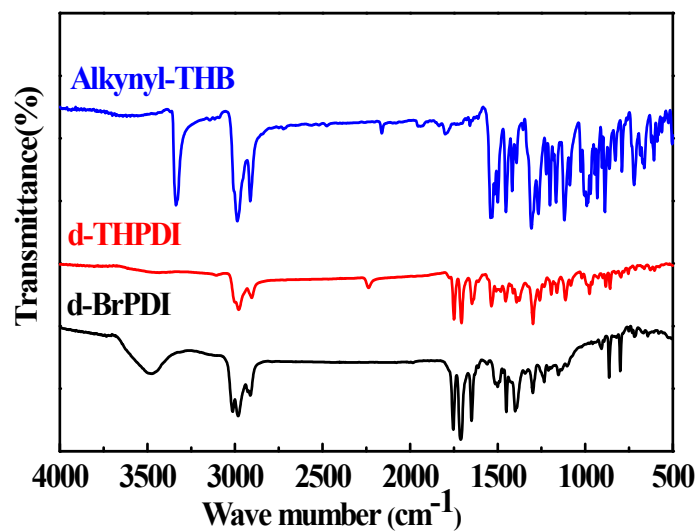

Fig. S1 FT-IR spectra of d-BrPDI, Alkynyl-THB and title compound d-THBPDI

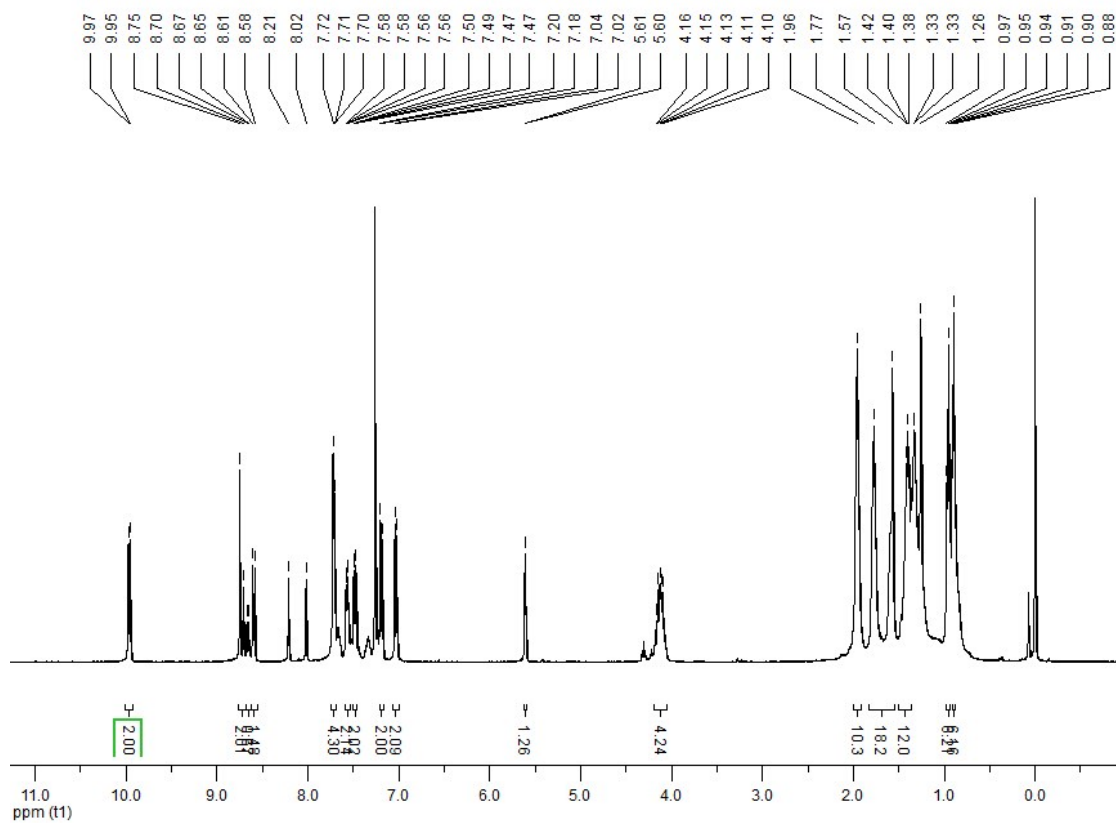

Fig. S2  $^1\text{H}$  NMR spectra of title compound d-THBPDI

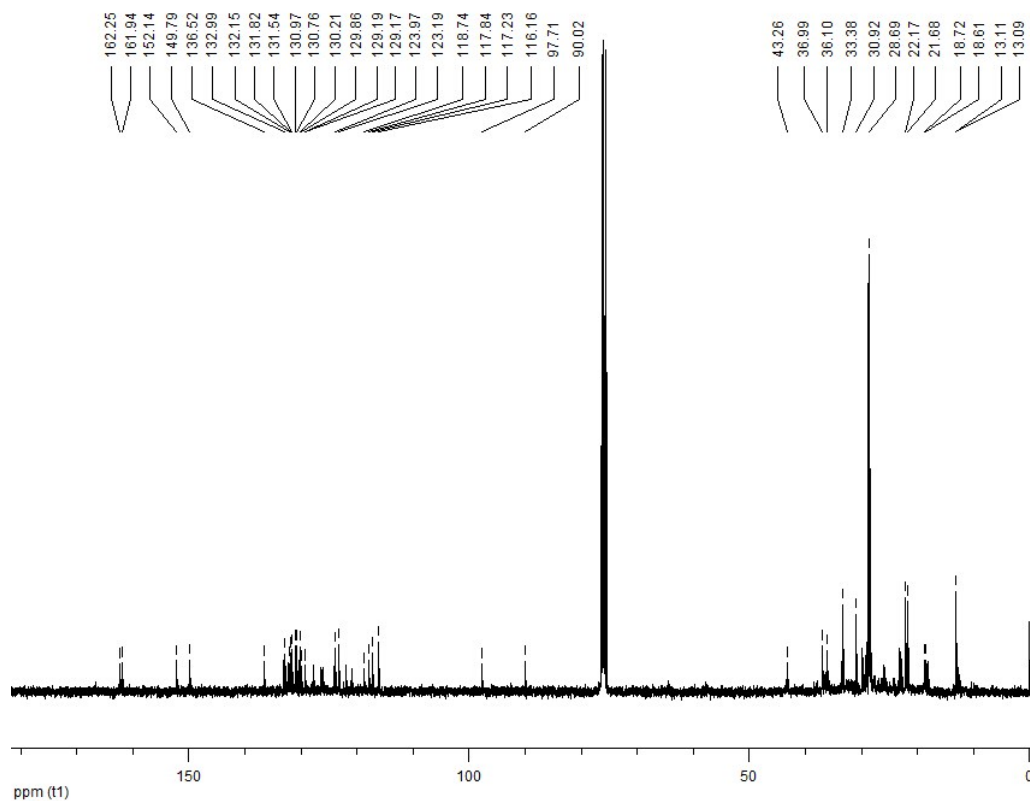

Fig. S3  $^{13}\text{C}$  NMR spectra of title compound d-THBPDI

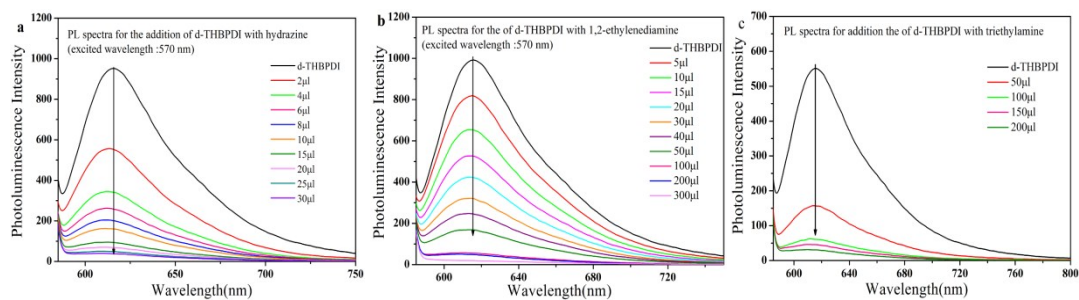

Fig. S4 Photoluminescence spectra of d-THBPDI upon adding various organic bases of different volume

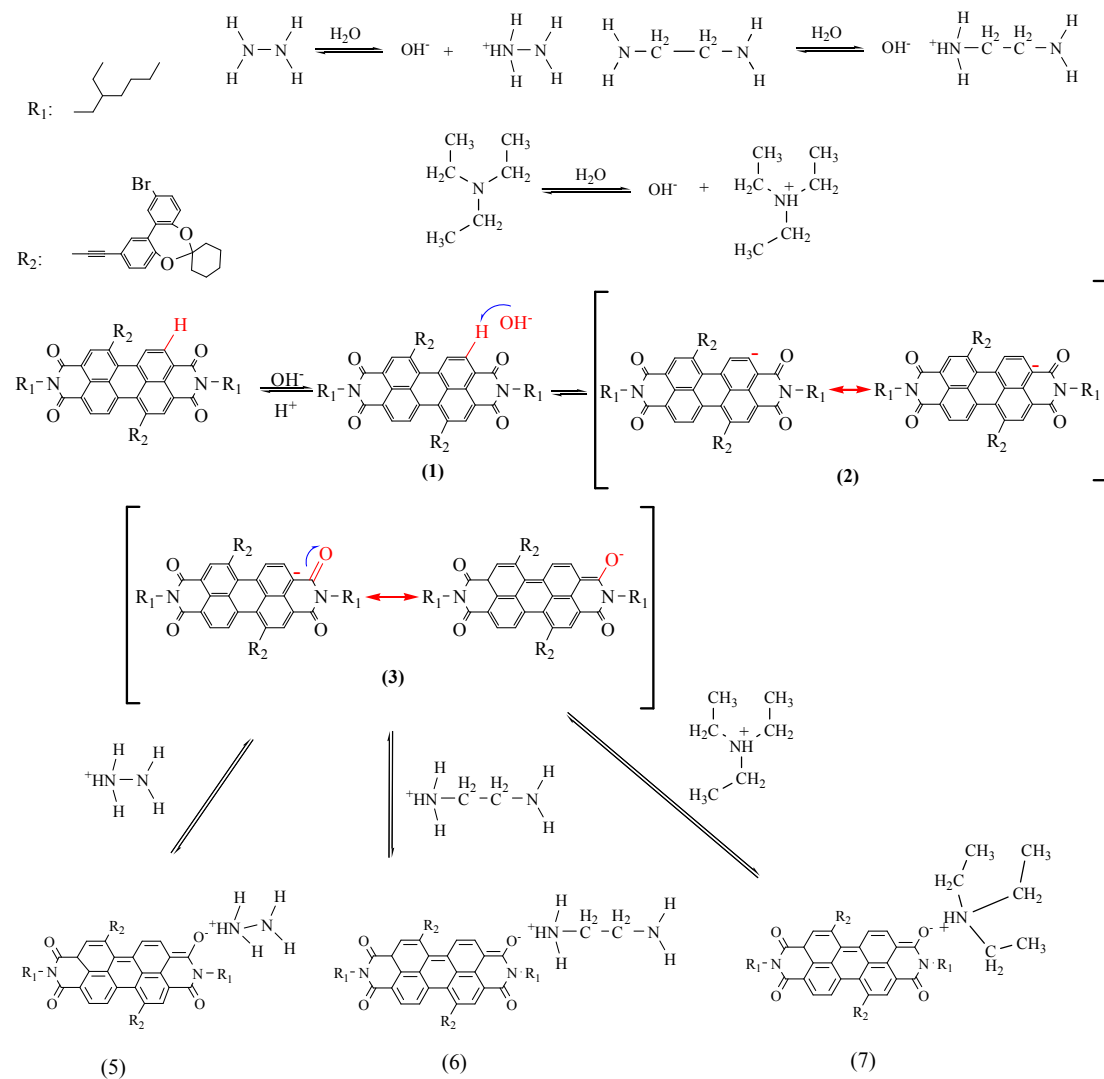

Scheme 2 Organic base-driven keto-enol anion tautomerism mechanism of d-THBPDI $\leftrightarrow$ d-THBPDI<sup>-</sup>

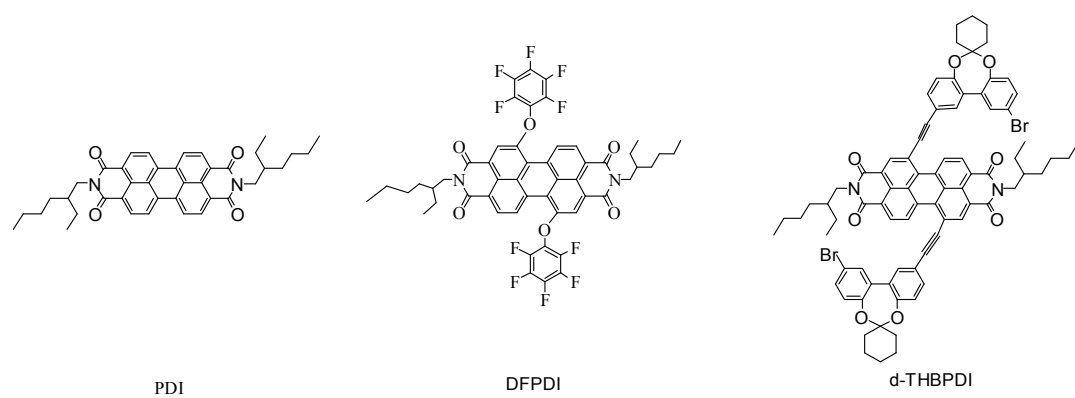

Scheme 3 The molecule structure of PDI, DFPDI and d-THBPDI.

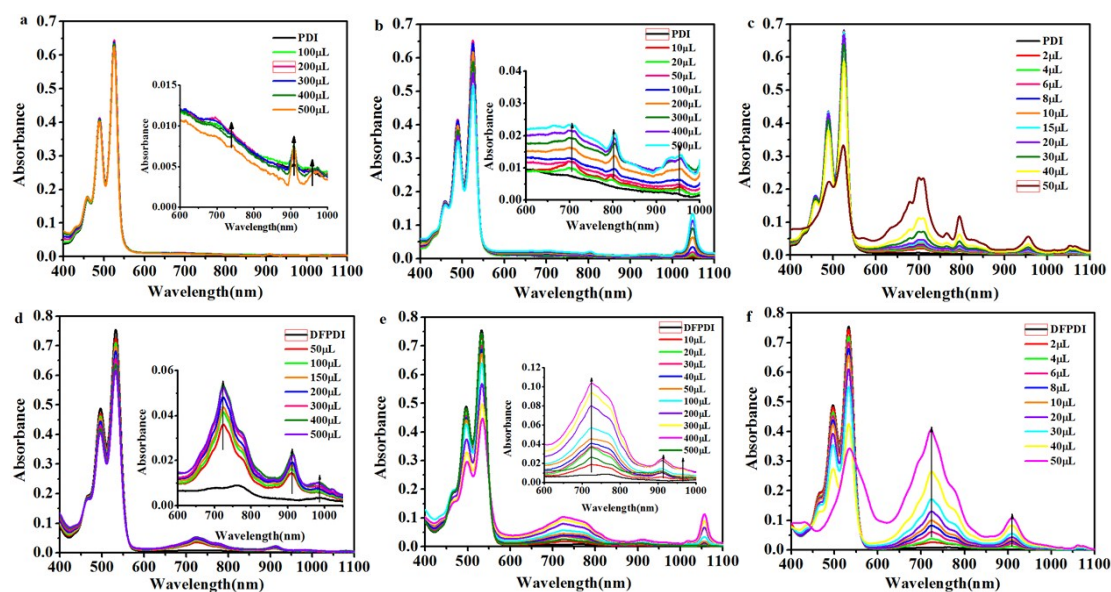

Fig. S5 UV-vis spectra of PDI (a, b and c) and DFPDI (d, e and f) in the different amount of triethylamine, ethanediamine and hydrazine, respectively.

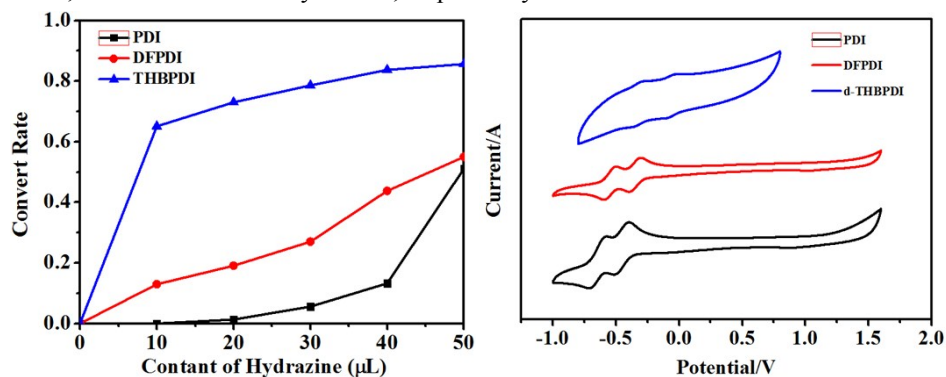

Fig. S6 The convert rate of PDI, DFPDI and d-THBPDI with addition of hydrazine (a) Cyclic voltammety of PDI, DFPDI and d-THBPDI containing  $[nBu_4N][PF_6]$  (0.1M) with respect to Ag/AgCl in DMF (b)

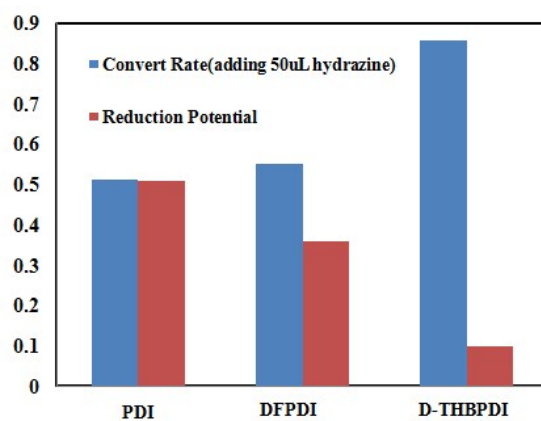

Fig. S7 The convert rate of PDI, DFPDI and d-THBPDI with adding 50 $\mu$ L hydrazine (blue) and their absolute value of reduction potential (red).
